# Supplementary material for: Backbone rigidity and static presentation of guanidinium groups increases cellular uptake of arginine-rich cell-penetrating peptides
Source: PubMed Central journal article supplement — Nat Commun. 2011 Aug 30;2:453–. doi: 10.1038/ncomms1459 (PMC3265364; doi:10.1038/ncomms1459), 2011-08-30
Supplement: ncomms1459-s1.pdf [file ncomms1459-s1.pdf]

# Backbone rigidity and static presentation of guanidinium groups increases cellular uptake of arginine-rich cell penetrating peptides

## Supplementary Information

**Supplementary Table S1:  
Peptide sequences, linkers and molecular weight**

| Peptide    | Sequence                                         | Label (linker) | MW [kDa] |
|------------|--------------------------------------------------|----------------|----------|
| TAT        | rrrqrrkkr                                        | (Ahx)          | 1.396    |
| TAT        | rrrqrrkkr                                        | FI (Ahx)       | 1.807    |
| TAT        | rrrqrrkkr                                        | FITC (Ahx)     | 1.897    |
| TAT        | rrrqrrkkr                                        | TAMRA (Ahx)    | 1.921    |
| cyclic TAT | KrRrGrKkRrE                                      | FI (K1)        | 1.866    |
| R10        | rrrrrrrrr                                        |                | 1.692    |
| R10        | rrrrrrrrr                                        | FI             | 2.065    |
| R10        | rRrRrRrRrRq                                      | FI             |          |
| cyclic R10 | KrRrRrRrRrRE                                     | FI             | 2.175    |
| PTD4       | YARAARQARA                                       | Biotin (Ahx)   | 1.542    |
| PTD4       | araqraaray                                       | TAMRA (Ahx)    | 1.615    |
| TAT-p21    | rrrqrrkkr <sup>gaa</sup> AGRKRRQTSMTDFYHSKRRLIFS | FI             | 4.914    |
| p21        | GRKRRQTSMTDFYHSKRRLIFS                           | FI             | 3.327    |
| VLC-1-TAT  | MAPKKPEPKDDAK <u>APAG</u> RRKRRQRRRC             |                | 3.175    |
| VLC-1      | MAPKKPEPKDDAK <u>APAC</u>                        |                | 1.737    |
| VLC-1-TAT  | MAPKKPEPKDDAK <u>APAG</u> RRKRRQRRRC             | TAMRA (C)      | 3.856    |
| VLC-1      | MAPKKPEPKDDAK <u>APAC</u>                        | TAMRA (C)      | 1.737    |
| TAT-NBD    | YGRKKRRQRRRTALDWSWLQTE                           |                | 2.891    |
| NBD        | TALDWSWLQTE                                      |                | 1.348    |
| TAT-NBD    | YGRKKRRQRRRTALDWSWLQTE                           | FI (Ahx)       | 3.559    |
| NBD        | TALDWSWLQTE                                      | FI (Ahx)       | 1.819    |

Lower case letters indicate D- and upper case letters L-amino acids. The labeled form of PTD4 as well as several other peptides were synthesized in the retro-inverso (retro-all D) form. Linker sequences are underlined. The fluorophores are given together with the amino acid or chemical compound used for coupling at the N-terminus.

**Supplementary Table S2:  
Measured and deduced parameters obtained by analytical ultracentrifugation.**

| <b>Construct</b> | <b><math>s_{20,W}</math></b> | <b><math>D_{20,W}</math><br/>[<math>10^7 \text{ cm}^2 \text{ s}^{-1}</math>]</b> | <b><math>M_{\text{exp.}}</math><br/>[kDa]</b> | <b><math>f/f_0</math></b> | <b><math>V_{\text{dry}}</math><br/>[<math>\text{nm}^3</math>]</b> | <b><math>d_{\text{sphere}}</math><br/>[nm]</b> | <b><math>d_a</math><br/>[nm]</b> | <b><math>d_b</math><br/>[nm]</b> |
|------------------|------------------------------|----------------------------------------------------------------------------------|-----------------------------------------------|---------------------------|-------------------------------------------------------------------|------------------------------------------------|----------------------------------|----------------------------------|
| TAT              | 0.291                        | 18.6                                                                             | 1.445                                         | 1.39                      | 1.71                                                              | 1.48                                           | 5.21                             | 0.79                             |
| R10              | 0.303                        | 16.83                                                                            | 1.692                                         | 1.49                      | 2.08                                                              | 1.58                                           | 5.60                             | 0.84                             |
| PTD <sub>4</sub> | 3.75                         | 21.55                                                                            | 1.542                                         | 1.16                      | 0.79                                                              | 1.158                                          | 3.70                             | 0.98                             |
| cyclicTAT (FI)   | 0.368                        | 19.99                                                                            | 1.87                                          | 1.14                      | 2.31                                                              | 1.64                                           | 2.50                             | 0.70                             |
| TAT-p21 (FI)     | 0.606                        | 10.97                                                                            | 4.843                                         | 1.50                      | 5.92                                                              | 2.24                                           | 10.00                            | 1.06                             |
| p21 (FI)         | 0.521                        | 13.30                                                                            | 3.081                                         | 1.40                      | 3.76                                                              | 1.55                                           | 7.39                             | 0.98                             |
| VLC-1-TAT        | 0.410                        | 12.43                                                                            | 3.135                                         | 1.55                      | 4.07                                                              | 1.00                                           | 9.20                             | 0.46                             |
| VLC-1            | 0.420                        | 24.26                                                                            | 1.626                                         | 1.00                      | 2.00                                                              | 1.56                                           | 1.56                             | 1.56                             |
| TAT-NBD          | 0.539                        | 14.80                                                                            | 3.274                                         | 1.29                      | 3.97                                                              | 1.96                                           | 6.24                             | 1.11                             |
| NBD              | 0.397                        | 25.96                                                                            | 1.349                                         | 1.00                      | 1.61                                                              | 1.45                                           | 1.45                             | 1.45                             |

s - sedimentation coefficient, D - diffusion coefficient,  $M_{\text{exp.}}$ - molecular weight (experimental), V - volume and d - diameter.

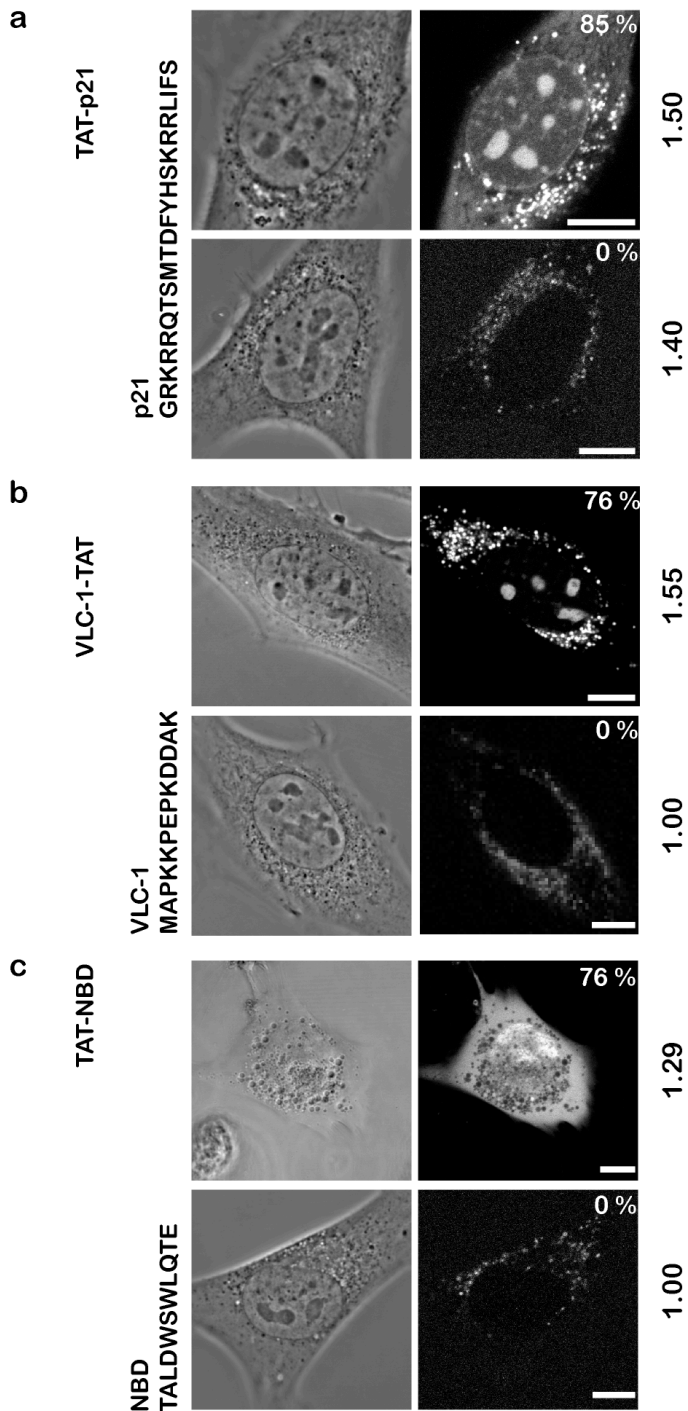

### Supplementary Fig. S1: Live cell internalization of TAT cargo fusions and cargos alone

Ability of cargo peptides with and without TAT to transduce into living mouse myoblast cells after incubation for one hour at  $15 \mu\text{M}$  in a volume of  $200 \mu\text{l}$  PBS. Representative transmission images of the phase contrast (PC) and confocal optical sections of the fluorescent peptides are shown. Transduction efficiencies are given as percentages in the fluorescence images ( $n=150$  cells) and the frictional ratio ( $f/f_0$ ) and the molecular dimension (d) calculated from the ultracentrifugation results are displayed on the right side of the images. PC: phase contrast, Scalebars =  $10 \mu\text{m}$ .

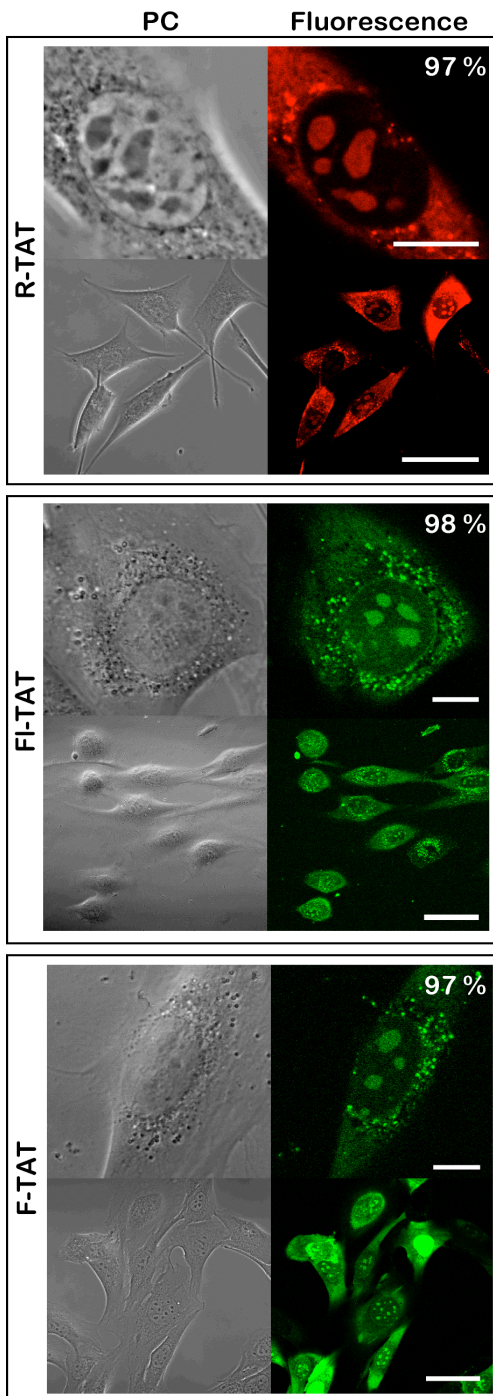

**Supplementary Figure S2: Different labels do not change uptake behaviour of RRP**

To ensure that different labels did not influence the transduction assay, TAT (amino acids 48-57 from the transactivator of transcription of the human HIV-1 protein) coupled to fluorophores FITC (F), fluorescein (FI) and TAMRA (T) utilized was tested for transduction ability and frequency as well as intracellular localization.

a

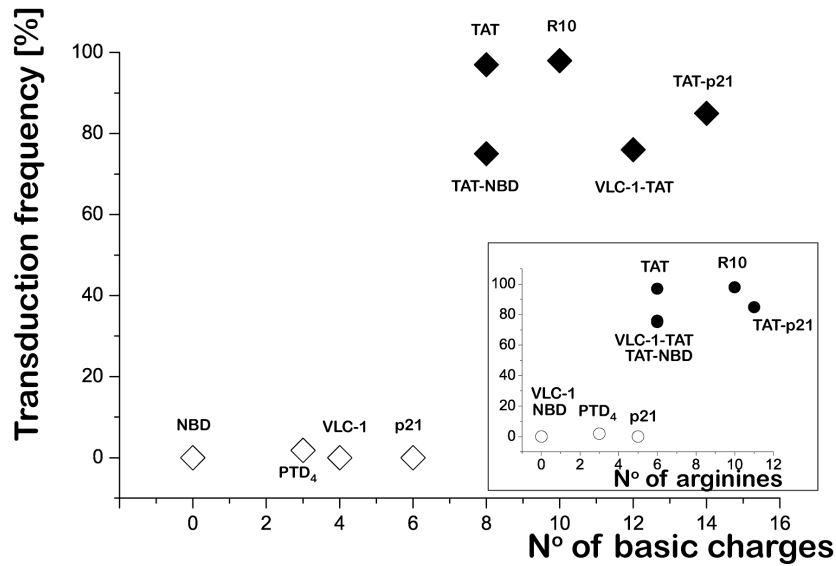

b

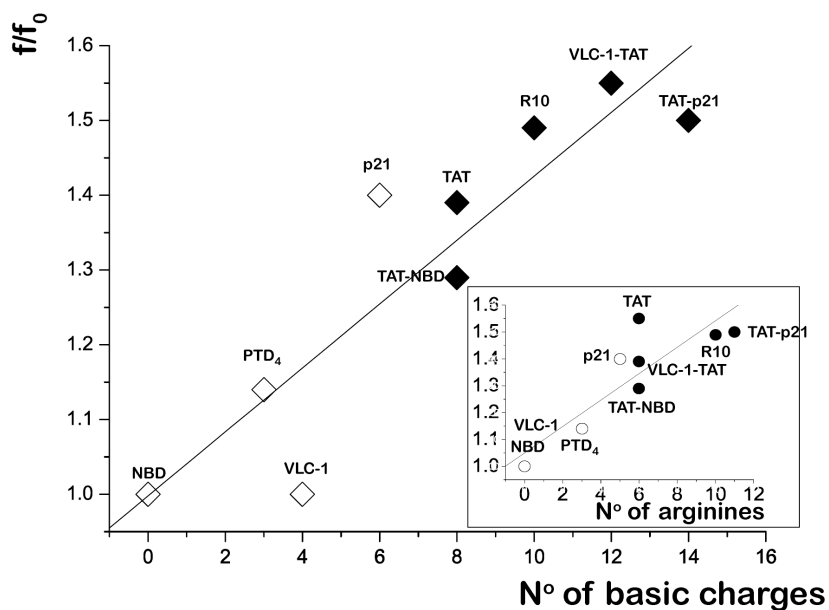

### Supplementary Figure S3: Influence of basic charges on transduction frequency and structure

Transduction percentages (a) and frictional ratios  $f/f_0$  of transducible (filled diamonds) and non-transducible (empty diamonds) peptides plotted against the number of basic residues and the number of arginines (inlay, transducible peptides filled circles and non-transducing peptides empty circles).

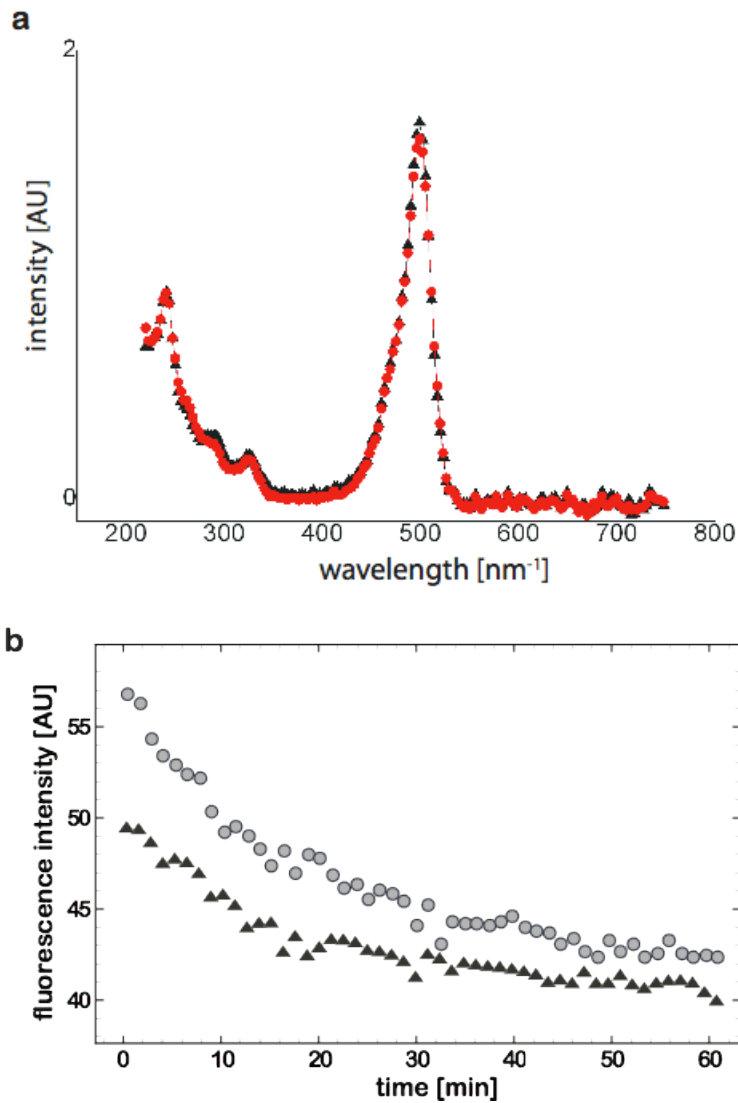

**Supplementary Figure S4: Comparison of the absorption spectra and extracellular fluorescence intensities during imaging of cyclic and linear TAT.**

**a** UV-VIS absorption spectra of cyclic and linear TAT peptide. Absorption of the peptides at 220 nm was used to assure that identical concentrations of both peptides were applied to living cells.

**b** Average intensities of extracellular fluorescence over time used to control for differences resulting from photobleaching and culture chamber inhomogeneities.
